# Supplementary material
Source: PubMed Central journal article supplement (PMC6601343)
Supplement: NIHMS1034948-supplement-1.pdf [file NIHMS1034948-supplement-1.pdf]

**Supplemental Table 1.** Unadjusted and adjusted mean and standard error (SE) systolic blood pressure (SBP) and diastolic blood pressure (DBP), according to trimester of pregnancy and U-Cd tertiles, Seattle and Tacoma, WA, 1996-2002

|                                 | First Trimester                 |                           | Second Trimester                |                                   | Third Trimester                 |                                   |
|---------------------------------|---------------------------------|---------------------------|---------------------------------|-----------------------------------|---------------------------------|-----------------------------------|
| U-Cd tertiles (µg/g Cr)         | Unadjusted Mean (SE)            | Mean difference (95% CI)  | Unadjusted Mean (SE)            | Mean difference (95% CI)          | Unadjusted Mean (SE)            | Mean difference (95% CI)          |
| <b>Systolic Blood Pressure</b>  |                                 |                           |                                 |                                   |                                 |                                   |
| ≤0.21                           | 112.5 ± 0.62                    | 0.0 (Reference)           | 113.35 ± 0.52                   | 0.0 (Reference)                   | 116.68 ± 0.57                   | 0.0 (Reference)                   |
| 0.22-0.41                       | 112.8 ± 0.65                    | 0.35 (-1.42, 2.12)        | 113.39 ± 0.54                   | 0.04 (-1.44, 1.52)                | 115.7 ± 0.59                    | -0.92 (-2.52, 0.68)               |
| ≥0.42                           | 111.2 ± 0.65                    | -1.29 (-3.06, 0.48)       | 110.95 ± 0.55                   | -2.4 (-3.9, -0.92) <sup>a</sup>   | 114.32 ± 0.59                   | -2.37 (-3.98, -0.76) <sup>b</sup> |
| <b>Diastolic Blood Pressure</b> |                                 |                           |                                 |                                   |                                 |                                   |
| ≤0.21                           | 68.51 ± 0.45                    | 0.0 (Reference)           | 67.99 ± 0.36                    | 0.0 (Reference)                   | 71.33 ± 0.43                    | 0.0 (Reference)                   |
| 0.22-0.41                       | 68.79 ± 0.48                    | 0.29 (-1.01, 1.58)        | 68.09 ± 0.38                    | 0.09 (-0.93, 1.12)                | 70.77 ± 0.45                    | -0.56 (-1.79, 0.66)               |
| ≥0.42                           | 67.84 ± 0.47                    | -0.66 (-1.96, 0.62)       | 66.9 ± 0.38                     | -1.09 (-2.12, -0.06) <sup>c</sup> | 69.37 ± 0.45                    | -1.96 (-3.19, -0.73) <sup>d</sup> |
|                                 |                                 |                           |                                 |                                   |                                 |                                   |
|                                 | <sup>1</sup> Adjusted Mean (SE) | Mean difference (95 % CI) | <sup>1</sup> Adjusted Mean (SE) | Mean difference (95% CI)          | <sup>1</sup> Adjusted Mean (SE) | Mean difference (95% CI)          |
| <b>Systolic Blood Pressure</b>  |                                 |                           |                                 |                                   |                                 |                                   |
| ≤0.21                           | 112.6 ± 0.64                    | 0.0 (Reference)           | 113.4 ± 0.52                    | 0.0 (Reference)                   | 116.71 ± 0.56                   | 0.0 (Reference)                   |
| 0.22-0.41                       | 113.0 ± 0.67                    | 0.51 (-1.33, 2.35)        | 113.5 ± 0.55                    | 0.39 (-1.11, 1.89)                | 115.8 ± 0.58                    | -0.78 (-2.4, 0.84)                |
| ≥0.42                           | 111.3 ± 0.68                    | -1.05 (-2.91, 0.81)       | 111.0 ± 0.55                    | -1.78 (-3.3, -0.26) <sup>e</sup>  | 114.3 ± 0.59                    | -2.1 (-3.74, -0.45) <sup>f</sup>  |
| <b>Diastolic Blood Pressure</b> |                                 |                           |                                 |                                   |                                 |                                   |
| ≤0.21                           | 68.5 ± 0.46                     | 0.0 (Reference)           | 68.02 (0.37)                    | 0.0 (Reference)                   | 71.3 ± 0.43                     | 0.0 (Reference)                   |
| 0.22-0.41                       | 69.0 ± 0.48                     | 0.48 (-0.84, 1.79)        | 68.17 (0.38)                    | 0.25 (-0.80, 1.31)                | 70.91 ± 0.45                    | -0.40 (-1.59, 0.87)               |
| ≥0.42                           | 68.09 ± 0.49                    | -0.29 (-1.62, 1.04)       | 67.07 (0.39)                    | -0.75 (-1.82, 0.32)               | 69.5 ± 0.46                     | -1.7 (-2.9, -0.40) <sup>g</sup>   |

<sup>1</sup>Adjusted for maternal age, race/ethnicity, parity, smoking, prenatal vitamin use, family history of hypertension, GDM case and physical activity. The adjusted mean values reported are from a regression model based on the entire study cohort (N=653) with indicators variables specified to represent Non-Hispanic white, nulliparous, never smokers, prenatal vitamin

using women from 25-34 years of age, no family history of hypertension, no gestational diabetes and physical active during pregnancy.

<sup>a</sup>P-value =0.002; <sup>b</sup>P-value=0.004; <sup>c</sup>P-value=0.038; <sup>d</sup>P-value=0.002; <sup>e</sup>P-value=0.022; <sup>f</sup>P-value=0.013; <sup>g</sup>P-value=0.010
